# Supplementary material
Source: publisher figshare collection journal article supplement (https://springernature.figshare.com/ndownloader/files/22332141)
Supplement: Supplementary file 1 [file 22332141]

## Sheet: m.s.
																																																	5.4
	Additional file 2 Raw data of magnetic susceptibilities of laterite blocks used for the bridge construction along the East Royal Road
		Bridge No. along the East Royal Road																									Temple (Angkor monuments)
		2494	3708	3706	213	7397	7081	2495	2496	3705	3707	1600	3701	1599	225	319	318	2498	3703	3702	306	1974	5426	1025	2695	466	Angkor Thom	Prasat Suor Prat	Beanteay Samre	Beanteay Samre	Chau Say Tevoda	Ta Prohm	Banteay Kdei	Thommanon	Chau Say Tevoda	Angkor Wat
																											Outer Enclosure	S2&N3 Towers	Outer Enclosure	Inner Enclosure	Outer Enclosure	Inner Enclosure	Inner Enclosure	Enclosure	Foundation	Outer Enclosure
	M.S. (10-3 SI units)	0.28	0.35	0.5	3.12	0.81	0.953	1.21	1.61	0.479	0.705	0.67	0.935	0.402	0.837	0.398	0.646	1.34	0.761	0.839	0.409	0.678	0.581	0.317	0.577	0.242	0.19	0.438	0.586	0.691	0.177	0.18	0.093	0.357	0.377	0.316
		0.58	0.42	0.41	0.62	0.75	1.05	1	1.23	0.483	0.42	0.452	0.479	0.745	0.388	0.395	1.94	0.92	0.602	1.62	0.811	1.43	0.56	0.775	0.368	0.352	0.331	0.291	0.368	0.295	0.408	0.194	0.449	0.455	0.6	0.229
		0.56	0.39	0.22	0.61	0.49	1.01	1.56	1.97	0.508	0.761	0.603	0.423	0.447	0.545	0.293	1.32	1.37	0.855	0.431	1.2	0.235	0.277	0.31	0.407	0.275	0.288	0.265	0.614	0.349	0.473	0.341	0.035	0.778	0.483	0.385
		0.46	0.59	0.45	1.89	0.49	2.01	1.54	1.11	0.631	0.414	0.471	0.503	2.22	1.6	0.358	0.291	0.86	1.15	1.74	1.45	0.348	0.586	0.793	0.556	0.424	0.205	0.407	0.158	0.376	0.603	0.4	0.34	0.371	0.53	0.257
		0.59	0.31	0.53	0.46	0.69	0.985	1.28	2.65	0.482	0.62	0.53	1.07	0.973	0.328	0.626	1.23	1.45	0.492	0.655	1.48	2.36	0.38	0.806	1.89	0.309	0.267	0.801	0.352	0.2	0.297	0.299	0.181	0.771	0.531	0.309
		1.22	0.61	0.44	3.85	2.17	0.833	0.832	0.752	0.521	0.542	0.762	1.2	0.488	2.55	0.393	0.461	0.845	0.48	0.754	0.876	0.405	0.594	1.18	0.55	0.267	0.455	0.382	0.359	0.168	0.467	0.538	0.029	0.313	0.38	0.413
		0.33	0.32	0.3	0.34	1.63	0.984	0.685	1.16	0.617	0.516	0.451	0.694	0.698	0.741	0.765	0.278	0.844	0.38	1.11	1.23	0.494	0.645	1.44	0.329	0.351	0.194	1.02	0.367	0.238	0.325	0.432	0.511	0.693	0.929	0.302
		0.33	0.43	0.39	1.4	2.59	1.28	1.54	0.619	0.766	0.778	1.49	0.466	1.13	0.495	0.435	0.059	1.13	0.603	0.629	2.63	0.489	0.245	0.792	1.69	0.284	0.212	0.567	0.381	0.216	0.269	0.195	0.621	0.271	0.666	0.298
		0.49	0.39	0.48	3.87	2.2	1.01	1.71	0.564	0.63	0.469	1.49	0.568	1.19	0.429	0.292	1.03	1.14	0.958	0.616	3.23	0.751	0.369	0.944	0.313	0.299	0.165	0.54	0.425	0.283	0.529	0.297	0.411	0.765	0.722	0.741
		0.47	0.25	0.53	0.57	1.32	1.65	0.764	3.22	0.448	0.453	0.226	0.579	0.743	0.295	0.34	0.703	1.07	1.46	0.637	1.35	0.675	0.389	0.372	1.65	0.349	0.371	0.291	1.13	0.299	0.634	0.287	0.343	0.313	0.658	0.637
		0.38	0.31	0.51	0.42	0.64	2.57	1.3	0.648	0.584	0.55	0.446	0.485	0.741	0.346	0.645	0.246	0.823	1.35	1.51	1.49	0.779	0.353	1.27			0.161	0.392	0.567	0.317	0.504	0.323	0.368	0.486	0.412	0.362
		0.34	0.26	0.35	0.52	1.7	2.17	1.07	0.937	0.882	0.458	1.38	0.345	1.33	0.266	0.325	0.5	1.09	0.66	0.867	1.33	0.441	0.518	1.43			0.25	0.419	0.753	1.02	0.184	0.338	0.1616	0.582	0.488	0.3
		1.18	0.41	0.62	0.64	1.31	1.28	0.577	1.64	0.887	0.628	0.393	1.65	0.675	1.55	0.601	0.378	1.45	0.996	0.947	0.59	1.2	0.28	2.2			0.121	0.279	0.416	0.524	0.302	0.305	2.85	0.495	0.599	0.181
		0.36	0.78	0.24	0.87	2.12	1.48	0.878	2.3	0.538	0.345	0.396	0.496	0.355	0.829	0.34	0.301	1.81	0.356	0.296	1.77	1.84	0.358	1.02			0.222	0.281	0.375	0.268	0.879	0.285	0.215	0.418	0.654	0.345
		0.69	0.33	0.34	0.57	0.62	1.79	1.98	2.3	0.459	0.346	0.438	0.776	0.324	0.596	0.432	0.188	1.23	0.729	0.896	0.744	3.14	0.54	0.679			0.237	0.277	0.369	0.299	0.45	0.73	0.601	0.923	0.431	0.231
		1.09	1.3	0.7	1.23	1.28	3.63	1.65	2.08	0.432	0.691	0.685	0.287	0.865	0.375	0.489	0.661	1.71	1.8	0.843	1.24	1.22	0.439	1.5			0.187	0.268	0.466	0.459	0.5	0.39	0.431	0.86	0.293	0.311
		0.45	0.74	0.64	0.46	1	1.99	0.683	2.9	0.26	0.354	0.273	0.561	0.915	0.427	0.733	0.505	0.569	1	0.748	0.708	1.55	0.355	0.795			0.401	0.277	0.346	0.455	0.423	0.299	0.836	0.638	0.613	0.16
		0.52	0.33	0.35	0.32	0.67	0.808	0.914	1.24	0.52	0.358	0.441	0.353	0.38	0.537	0.275	0.581	0.773	1.55	0.607	0.466	0.466	0.276	0.898			0.241	0.195	0.455	0.259	0.406	0.466	1.1	0.325	0.45	0.315
		0.43	0.35	0.49	0.44	1.69	2.05	0.934	1.1	0.486	0.663	0.494	0.361	0.894	0.445	0.396	0.908	1.42	0.525	1.36	0.835	0.492	0.219	0.87			0.319	0.254	0.288	0.392	0.626	0.205	0.203	1.23	0.515	0.464
		0.42	0.41	0.5	0.38	2.13	0.825	0.773	1.16	0.407	0.433	0.329	0.232	1.42	0.431	0.53	0.586	1.12	1.76	0.726	1.47	2.21	0.684	0.586			0.212	0.22	0.266	0.405	0.762	0.363	0.913	0.784	0.466	0.3
		0.3	1.08	0.54	0.51	2.09	0.791	2.84	1.4	0.55	0.394	0.498	0.492	0.426	0.111	0.866	0.399	1.4	1.63	0.512	1.09	0.527	0.315	1.26			0.228	0.298	0.617	0.324	0.463	0.262	0.136	0.436	0.466	0.266
		0.55	0.9	0.44	0.33	1.28	1.11	2.14	1.12	0.622	0.635	0.394	0.489	0.4	0.153	0.379	0.72	0.87	0.539	0.658	1.11	0.987	0.48	0.621			0.295	0.294	0.42	0.145	0.667	1.24	0.3	0.273	0.326	0.433
		1.04	0.97	0.46	0.42	0.68	3.21	1	0.91	0.587	1.36	0.469	0.569	0.383	0.206	0.444	0.602	1.02	0.536	1.3	1.21	0.316	0.48	0.807			0.216	0.246	0.355	0.22	0.461	0.629	0.227	0.784	1.06	0.295
		0.59	1.06	0.37	0.59	0.51	1.24	2.04	0.866	0.824	0.292	0.346	0.518	0.312	0.326	0.383	0.249	0.779	1	1.05	0.668	2.28	0.412	0.743			0.39	1.94	0.595	0.257	0.214	0.14	0.269	0.367	0.301	0.396
		0.26	0.82	0.37	0.33	0.49	1.87	0.898	0.773	0.281	0.427	0.499	0.704	0.3	0.221	0.559	0.491	1.18	0.825	0.562	1.52	1.42	0.222	0.692			0.28	0.266	0.335	0.378	0.374	0.423	0.388	0.599	0.638	0.871
		1.82	0.44	0.44	0.33	0.93	1.67	1.65	2.08	0.516	0.398	0.342	0.726	0.451	0.287	0.81	0.825	0.635	0.839	1.31	0.329	1.86	0.385	0.689			0.211	0.615	0.303	0.237	0.415	0.78	0.105	0.342	0.482	0.276
		0.38	0.54	0.39	0.5	1.59	0.843	1.64	0.982	0.544	0.972	0.4	0.176	0.393	0.49	0.744	0.817	0.772	0.766	0.731	1.87	3.21	0.442	1.22			0.289	0.272	0.551	0.29	0.568	0.233	0.482	0.412	0.732	0.313
		0.8	0.49	0.46	2.4	0.88	0.865	0.786	1.67	0.395	0.435	0.538	0.457	0.638	0.46	0.811	0.196	0.608	0.743	0.527	1.35	0.398	0.524	0.574			0.296	0.584	0.347	0.301	0.527	0.37	1.06	0.227	1.2	0.214
		0.39	0.37	0.45	0.48	1.12	0.998	3.37	0.927	0.517	0.342	0.37	0.444	0.464	0.265	0.517	0.398	0.376	1.65	0.603	1.57	2.56	0.301	0.748			0.325	0.524	0.377	0.308	0.519	0.228	0.356	0.218	0.487	0.189
		0.38	0.81	0.31	0.76	1.67	1.32	0.859	1.94	0.474	0.504	0.42	0.569	0.287	0.389	0.587	1	1.21	1.11	0.902	1.5	4.49	0.801	0.795			0.201	0.296	0.398	0.344	0.548	0.43	0.228	1.01	0.803	0.384
		0.26	1.61	0.43	0.38	1.4	1.35	1.87	1.01	0.726	0.791	0.397	0.312	0.413	0.312	0.33	0.599	0.736	0.23	0.563	1.12	1.89	0.455	0.547			0.185	0.369	0.631	0.22	0.342	0.369	0.375	0.964	0.612	0.25
		0.54	0.29	0.43	0.31	0.52	2.36	0.65	1.95	0.426	0.288	0.394	0.309	1.2	0.413	0.413	0.181	0.655	0.36	1.62	0.821	0.738	0.398	0.532			0.152	0.283	0.333	0.324	0.44	0.306	0.161	0.308	0.465	0.291
		0.7	0.29	0.73	1.65	1.51	0.879	1.64	0.929	1.06	0.437	0.297	1.01	1.06	0.461	0.1	0.341	0.577	0.877	0.922	1.68	2.48	0.355	1.4			0.245	0.15	0.365	0.306	0.418	0.523	0.174	0.993	0.819	0.252
		0.28	0.58	0.37	0.58	1.3	1.26	1.88	2.56	0.462	0.418	0.925	1.05	0.438	0.362	0.662	0.446	1.11	0.333	1.14	0.369	0.468	0.509	0.608			0.227	0.208	0.25	0.227	0.35	0.416	0.511	0.419	1.01	0.307
		0.55	0.45	0.3	0.49	0.96	1.92	1.01	1.58	0.66	0.304	0.488	2.17	0.319	0.447	0.394	0.539	0.746	0.6	0.805	0.555	0.811	0.324	0.211			0.213	0.256	0.357	0.298	0.373	0.26	0.426	0.393	0.506	0.294
		0.58	0.53	0.32	0.6	1.9	2.37	1.99	2.07	0.735	0.418	0.336	0.398	0.205	0.646	0.411	0.387	1.11	0.353	0.977	1.21	2.38	0.374	2.46			0.192	0.26	0.739	0.331	0.606	0.687	0.293	0.488	2.5	0.249
		0.76	0.34	0.46	0.54	1.17	1.48	0.768	1.36	0.658	1.06	0.464	0.453	1.71	0.797	0.608	0.355	0.722	0.851	1.11	0.972	0.565	0.356	0.951			0.152	0.303	0.501	0.316	0.3	0.36	0.422	0.531	0.622	1.42
		0.49	0.6	0.34	0.42	2.03	0.597	1.77	1.02	0.466	0.514	1.17	0.572	0.429	0.536	0.561	0.469	0.653	0.63		0.82	0.642	0.262	1.27			0.181	0.185	0.479	0.363	0.445	0.379	0.758	0.32	0.36	0.409
		1.34	1.21	0.47	0.51	4.61	2.37	1	1.05	0.498	0.377	0.841	0.316	0.333	0.806	0.495	0.43	1.07	0.402		2.77	1.93	0.395	0.954			0.222	0.266	0.413	0.471	0.38	0.36	0.293	0.203	0.52	0.251
		0.51	0.44	0.45	1.33	1.99	1	0.754	1.23	0.677	0.498	0.448	0.615	0.664	0.445	0.439	0.61	1	0.604		0.889	0.786	0.437	0.432			0.317	0.336	0.335	0.3	0.457	0.312	0.424	0.431	0.797	0.426
	mean	0.59225	0.5775	0.438	0.901	1.37325	1.49652	1.33588	1.46542	0.56745	0.5342	0.5614	0.6203	0.694	0.553575	0.48935	0.57165	1.00483	0.833625	0.895216	1.2183	1.29853	0.421875	0.912275	0.833	0.3152	0.24615	0.395375	0.44355	0.336825	0.452125	0.38935	0.45199	0.53865	0.637575	0.36605
	median	0.5	0.44	0.44	0.53	1.29	1.28	1.14	1.23	0.5205	0.4555	0.4515	0.4995	0.476	0.438	0.437	0.4955	1.01	0.752	0.839	1.205	0.7985	0.392	0.795	0.553	0.304	0.2245	0.291	0.379	0.3035	0.4475	0.3505	0.362	0.4455	0.5305	0.3045
	s.d.	0.336966	0.322655	0.111475	0.911906	0.790768	0.696556	0.621664	0.666756	0.161728	0.22337	0.314461	0.384539	0.43895	0.445599	0.17168	0.358512	0.325923	0.425441	0.356246	0.626364	0.990676	0.132232	0.465701	0.638023	0.0539419	0.074502	0.303733	0.171323	0.150008	0.147644	0.200503	0.465619	0.257985	0.365663	0.22108
	*Standard deviation
